# Supplementary material for: The Impact of b/tsDMARD Dose Reduction on Chronic Hepatitis B in Rheumatoid Arthritis Patients: A Two-Center Long-Term Safety Analysis
Source: MDPI journal article supplement (doi:10.3390/jcm12010086), 2022-12-22
Supplement: s1 [file s1]

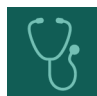

Supplementary Materials

# The Impact of b/tsDMARD Dose Reduction on Chronic Hepatitis B in Rheumatoid Arthritis Patients: A Two-Center Long-Term Safety Analysis

Der-Yuan Chen <sup>1,2,3,4</sup>, Hsin-Hua Chen <sup>1,4,5,6,7</sup>, Shih-Hsin Chang <sup>1,2,3</sup>, Yi-Ming Chen <sup>1,7,8</sup>, Po-Hao Huang <sup>2,3</sup>, Chia-Wei Hsieh <sup>1,9</sup>, Joung-Liang Lan <sup>2,3</sup> and Kuo-Tung Tang <sup>1,7,9,\*</sup>

<sup>1</sup> Ph.D. Program in Translational Medicine, National Chung Hsing University, Taichung 402, Taiwan

<sup>2</sup> Rheumatology and Immunology Center, China Medical University Hospital, Taichung 404, Taiwan

<sup>3</sup> College of Medicine, China Medical University, Taichung 404, Taiwan

<sup>4</sup> Institute of Medicine, Chung Shan Medical University, Taichung 402, Taiwan

<sup>5</sup> Division of General Medicine, Department of Medicine, Taichung Veterans General Hospital, Taichung 407, Taiwan

<sup>6</sup> Department of Industrial Engineering and Enterprise Information, Tunghai University, Taichung 407, Taiwan

<sup>7</sup> Faculty of Medicine, National Yang Ming Chiao Tung University, Taipei 112, Taiwan

<sup>8</sup> Division of Translational Medicine, Department of Medical Research, Taichung Veterans General Hospital, Taichung 407, Taiwan

<sup>9</sup> Division of Allergy, Immunology and Rheumatology, Taichung Veterans General Hospital, Taichung 407, Taiwan

\* Correspondence: dirac1982@vghtc.gov.tw; Tel.: +886-4-23592525 (ext. 3334)

**Table S1.** Medications used by RA patients with CHB who did not taper b/tsDMARDs after two years of b/tsDMARDs use.

| Medications                           | Baseline  | One year later |
|---------------------------------------|-----------|----------------|
| csDMARDs                              |           |                |
| Corticosteroids (mg/day) <sup>a</sup> | 4.3 (2.9) | 4.7 (3.5)      |
| Methotrexate (mg/week)                | 3.3 (5.7) | 2.9 (4.4)      |
| Cyclosporine, n (%)                   | 0 (0)     | 0 (0)          |
| Salazopyrine, n (%)                   | 3 (25)    | 3 (25)         |
| Azathioprine, n (%)                   | 0 (0)     | 0 (0)          |
| Leflunomide, n (%)                    | 1 (8)     | 1 (8)          |
| Hydroxychloroquine, n (%)             | 4 (33)    | 4 (33)         |
| Antiviral drugs for HBV, n (%)        | 3 (25)    | 3 (25)         |
| Entecavir, n (%)                      | 3 (100)   | 2 (67)         |
| Telbivudine, n (%)                    | 0 (0)     | 1 (33)         |

ACPA, anti-citrullinated protein antibodies; b/tsDMARDs, biologic/targeted synthetic disease modifying anti-rheumatic drugs; CHB, chronic hepatitis B; csDMARDs, conventional synthetic disease-modifying antirheumatic drugs; HBV, hepatitis B virus; RA, rheumatoid arthritis; TNF, tumor necrosis factor.

<sup>a</sup>presented as prednisone equivalent dose.

<sup>b</sup>calculated based on the quadratic approximation to the Poisson log likelihood.

**Table S2.** The effect of b/tsDMARD tapering on the incidence of HBV reactivation in random effects Poisson regression<sup>a</sup>.

|                                                                                                  | IRR (95% CI)      |
|--------------------------------------------------------------------------------------------------|-------------------|
| <b>Primary analysis</b>                                                                          | 0.50 (0.08, 2.95) |
| <b>Stratification analysis</b>                                                                   |                   |
| Patients with detectable HBV DNA levels before b/tsDMARDs tapering                               | 0.52 (0.09, 3.17) |
| Patients whose status of antiviral drugs use was consistent before and after b/tsDMARDs tapering | 0.79 (0.12, 5.24) |
| Patients whose percentage decrease in b/tsDMARDs was equal to or more than 50%                   | N.E.              |
| Users of TNF- $\alpha$ inhibitors                                                                | N.E.              |
| Abatacept users                                                                                  | N.E.              |
| Tocilizumab users                                                                                | N.E.              |
| Tofacitinib users                                                                                | 5.24 (0.57, 47.9) |
| <b>Sensitivity analysis</b>                                                                      |                   |
| Accounting for the institutional effect                                                          | 0.64 (0.10, 4.09) |

b/tsDMARDs, biologic/targeted synthetic disease modifying

anti-rheumatic drugs; HBV, hepatitis B; IRR, incidence rate ratio;

N.E., not estimable; TNF, tumor necrosis factor.

<sup>a</sup>adjusted for the use of antiviral drugs.

(A)

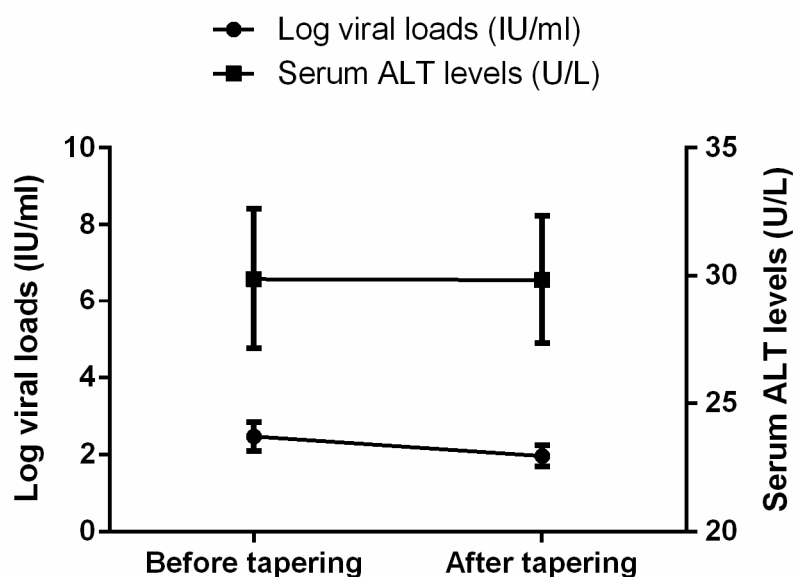

(B)

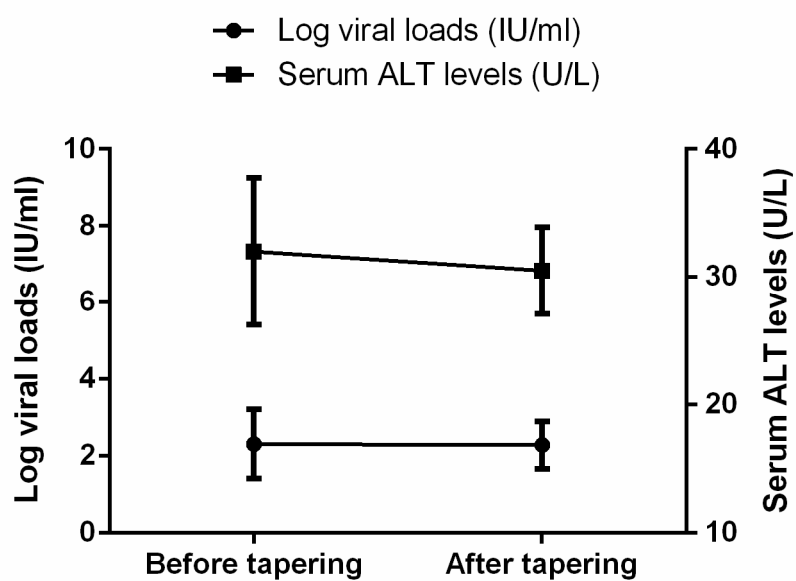

(C)

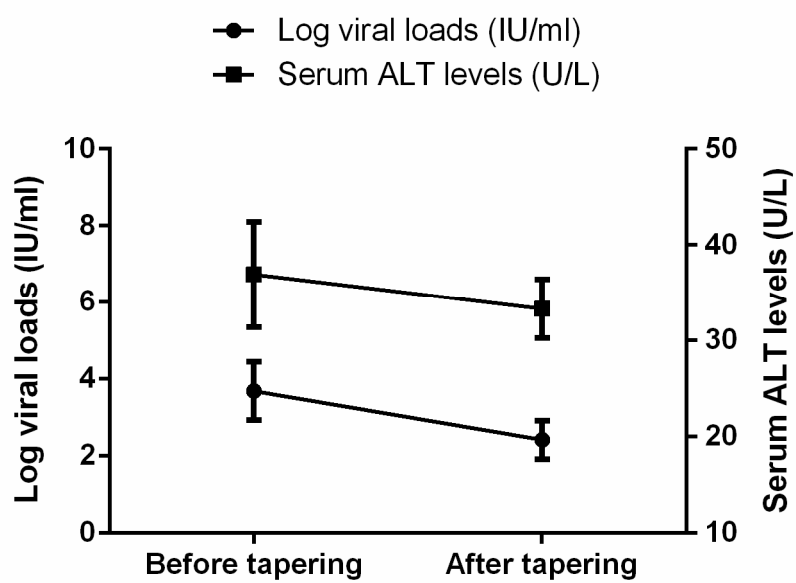

(D)

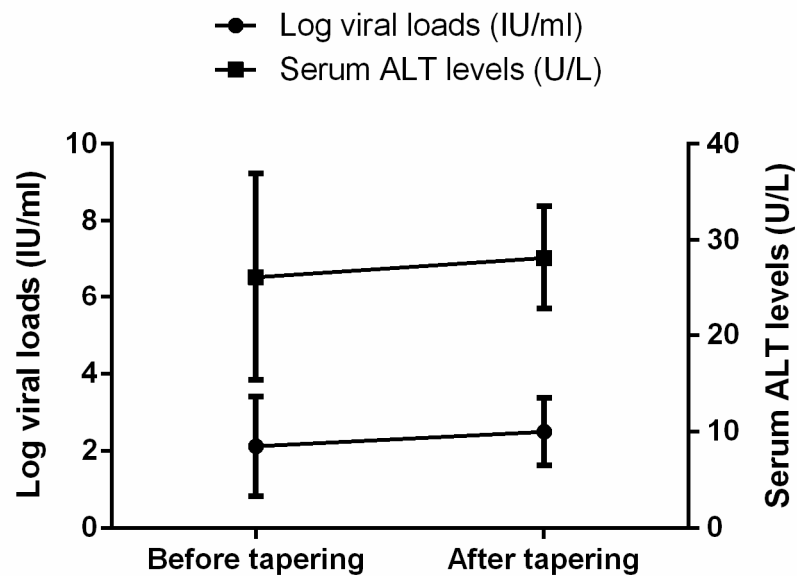

(E)

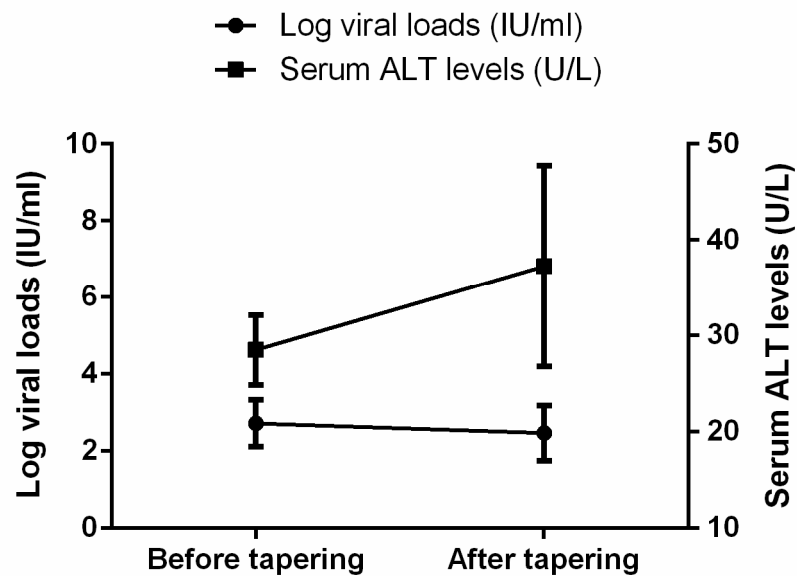

**Figure S1.** The change in serum levels of viral loads and ALT in RA patients with chronic hepatitis B before and after tapering of b/tsDMARDs, with respect to (A) 33 patients whose status of antiviral drugs use was consistent before and after b/tsDMARDs tapering, (B) 8 patients whose percentage decrease in b/tsDMARDs was equal to or more than 50%, (C) 12 patients who used TNF- $\alpha$  inhibitors, (D) 6 patients who used abatacept, and (E) 8 patients who used tofacitinib. Data are presented as mean  $\pm$  SEM. ALT, alanine aminotransferase; b/tsDMARDs, biological/targeted synthetic disease-modifying antirheumatic drugs; RA, rheumatoid arthritis; TNF, tumor necrosis factor.

(A)

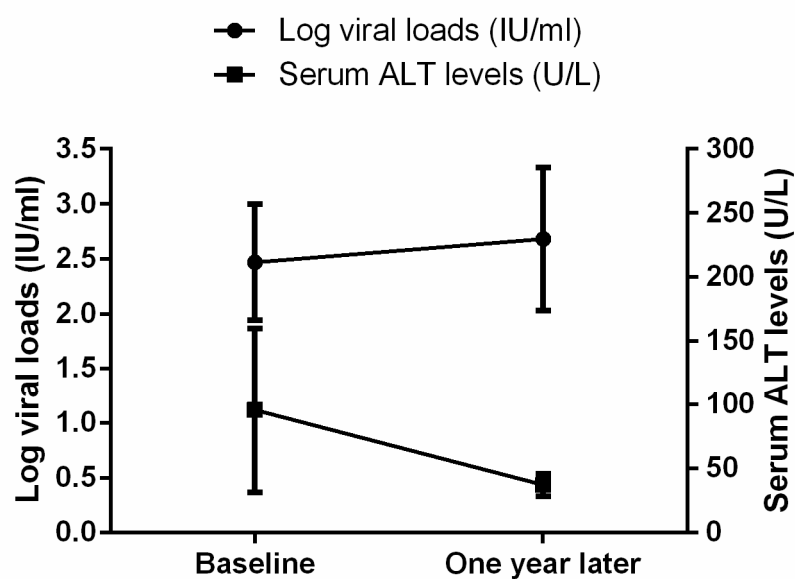

(B)

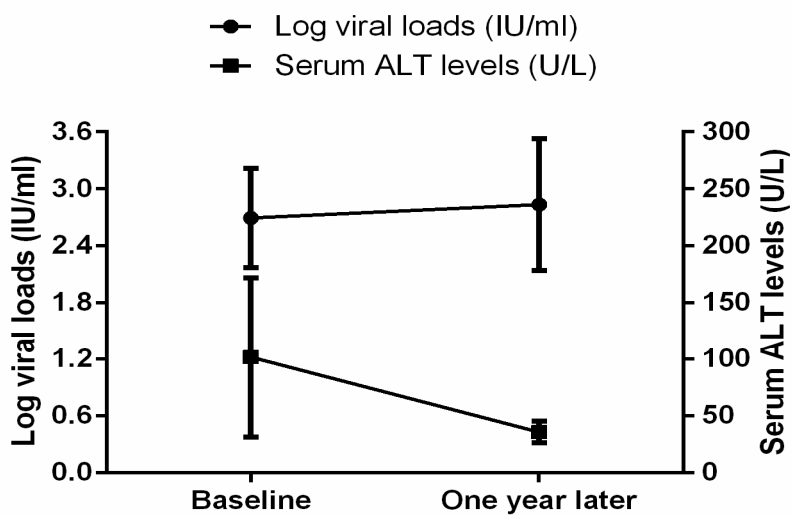

**Figure S2.** The change in serum levels of viral loads and ALT with time in RA patients who used b/tsDMARDs for more than 2 years without dose reduction, in regards to (A) all 12 patients, (B) 11 patients with detectable HBV DNA levels at baseline<sup>a</sup>. Data are presented as mean  $\pm$  SEM. ALT,

---

alanine aminotransferase; b/tsDMARDs, biological/targeted synthetic disease-modifying antirheumatic drugs; HBV, hepatitis B virus; RA, rheumatoid arthritis; TNF, tumor necrosis factor. <sup>a</sup>defined as 2 years since the first prescription of b/tsDMARDs.
